# Supplementary material
Source: PubMed Central journal article supplement (PMC11589916)

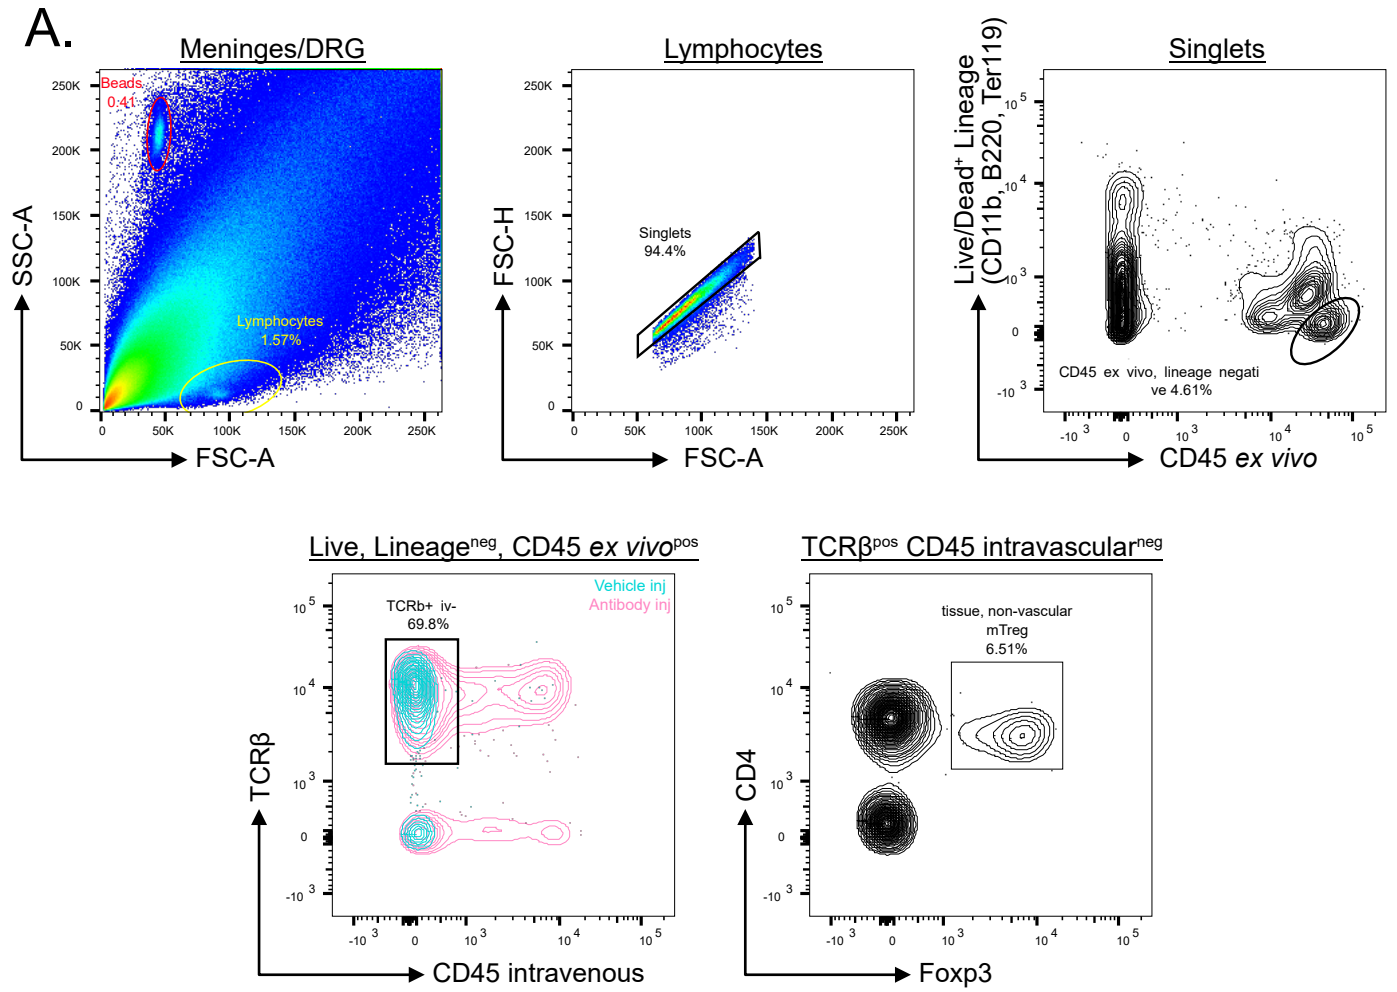



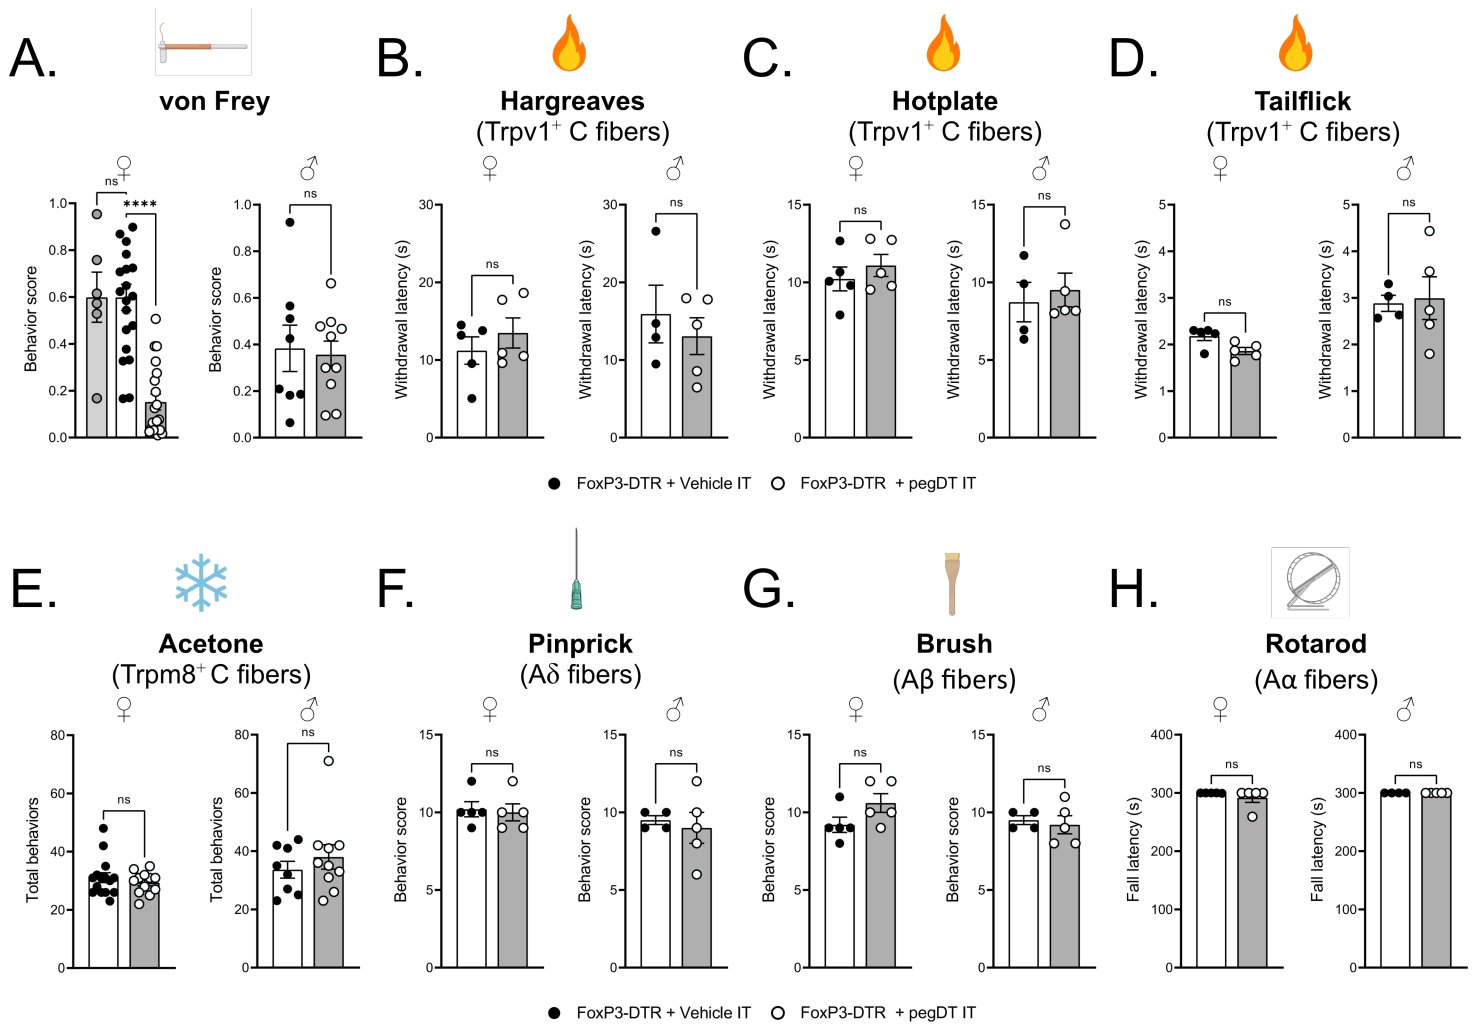



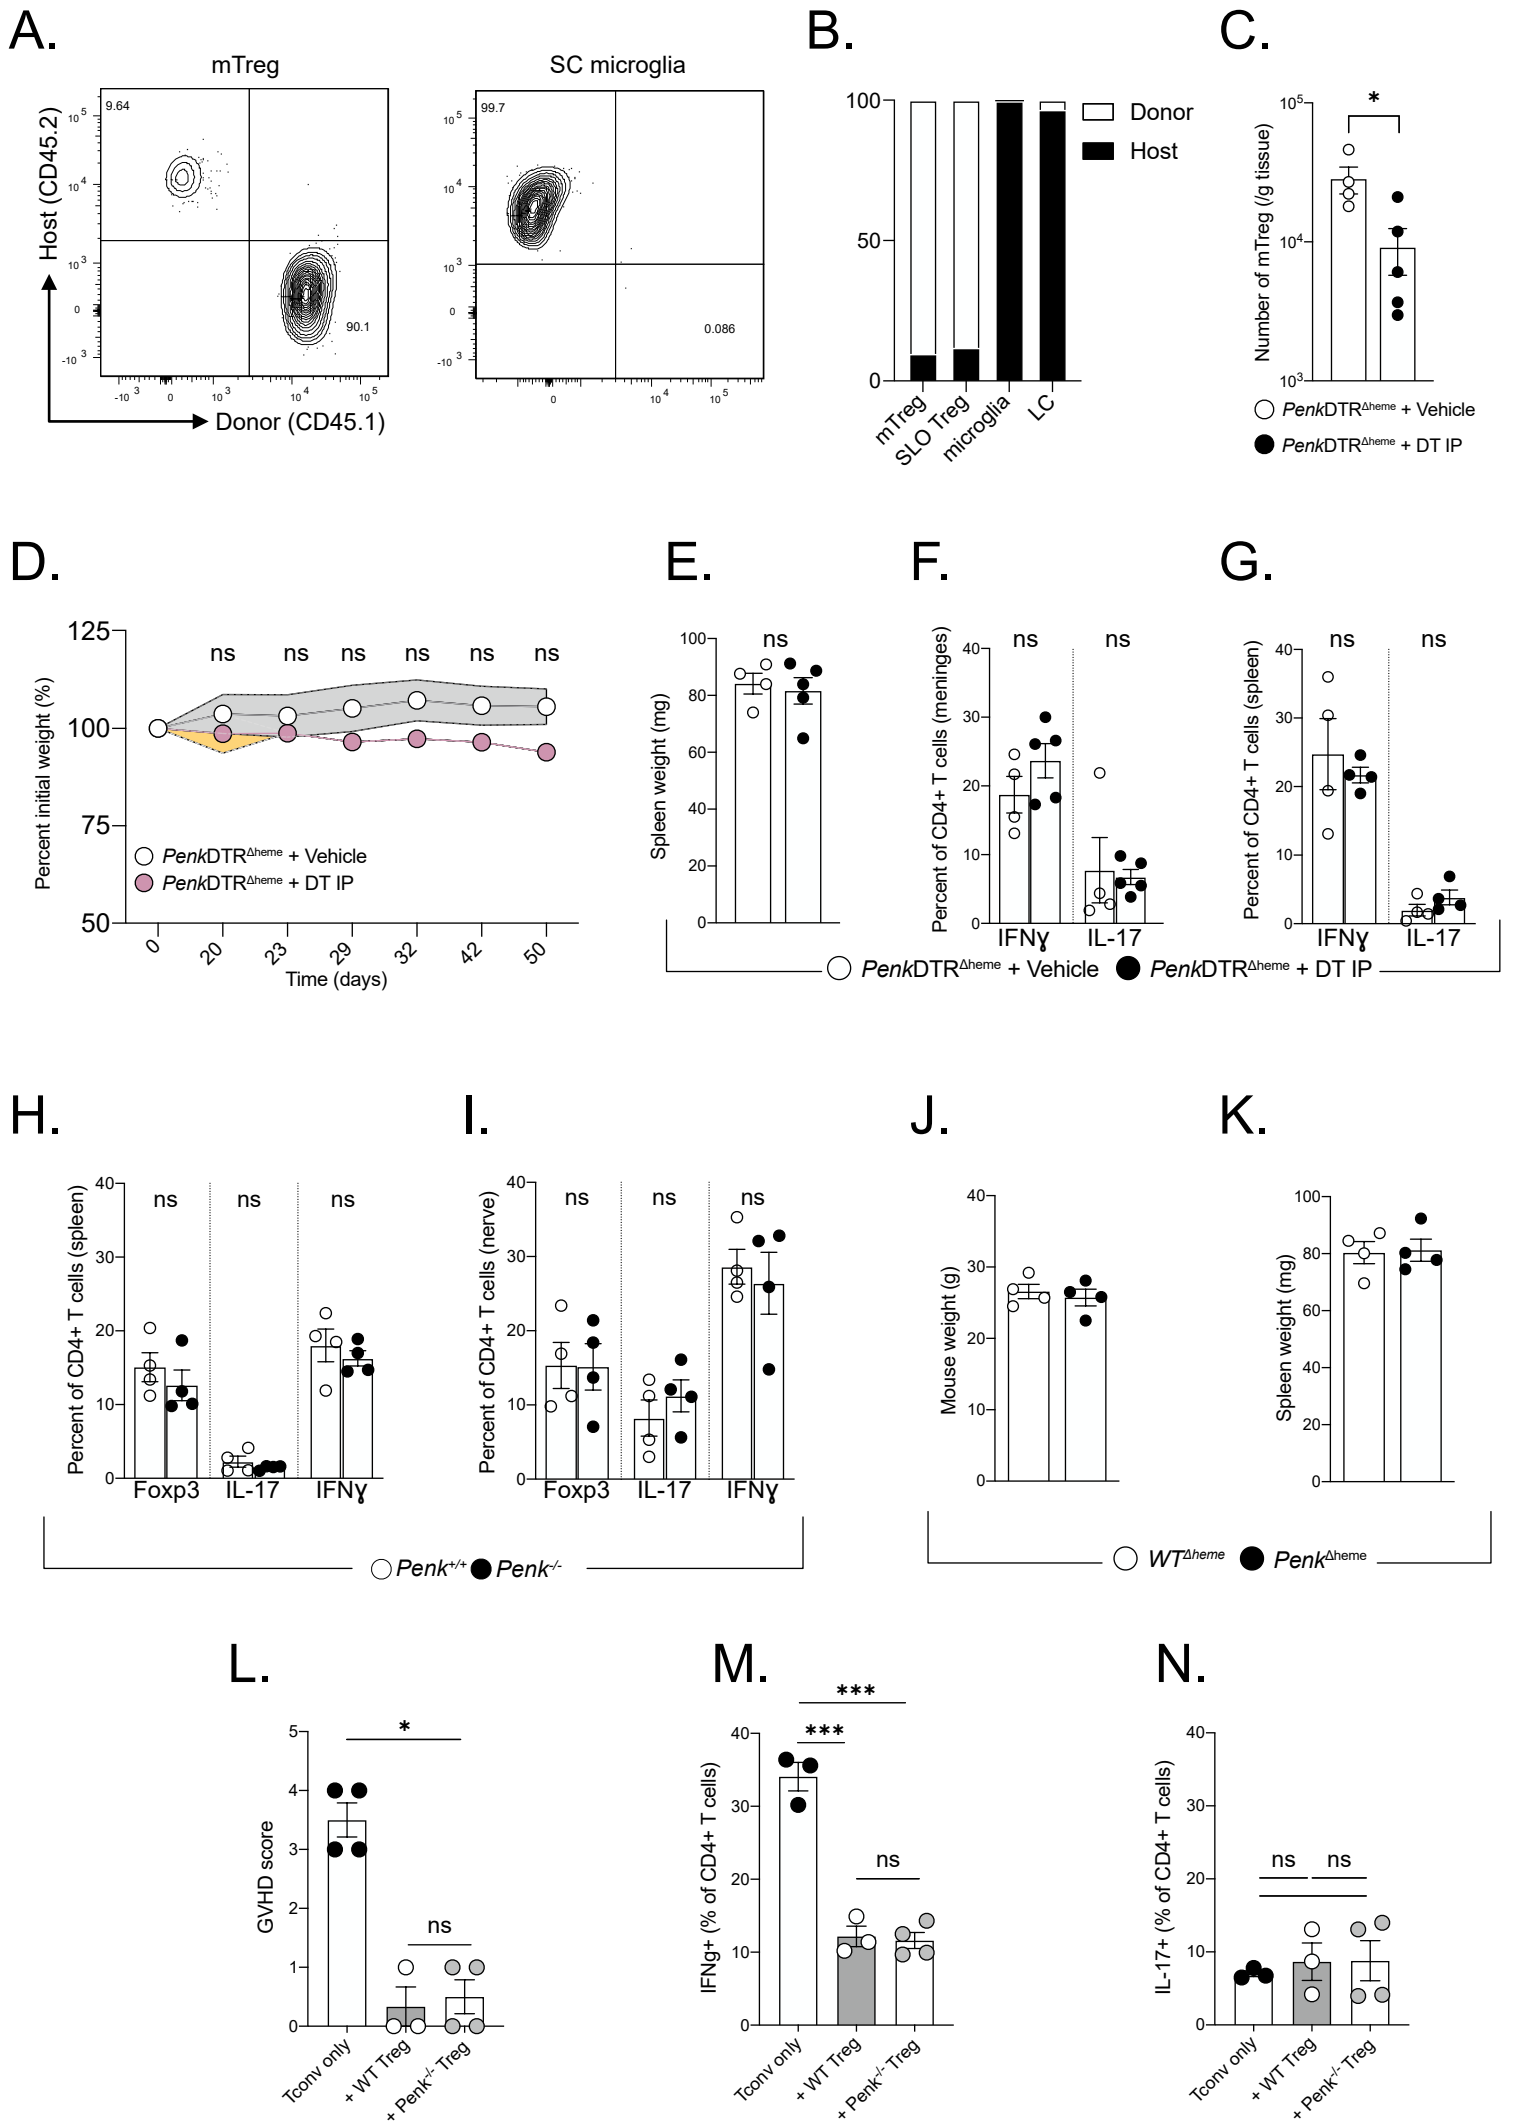

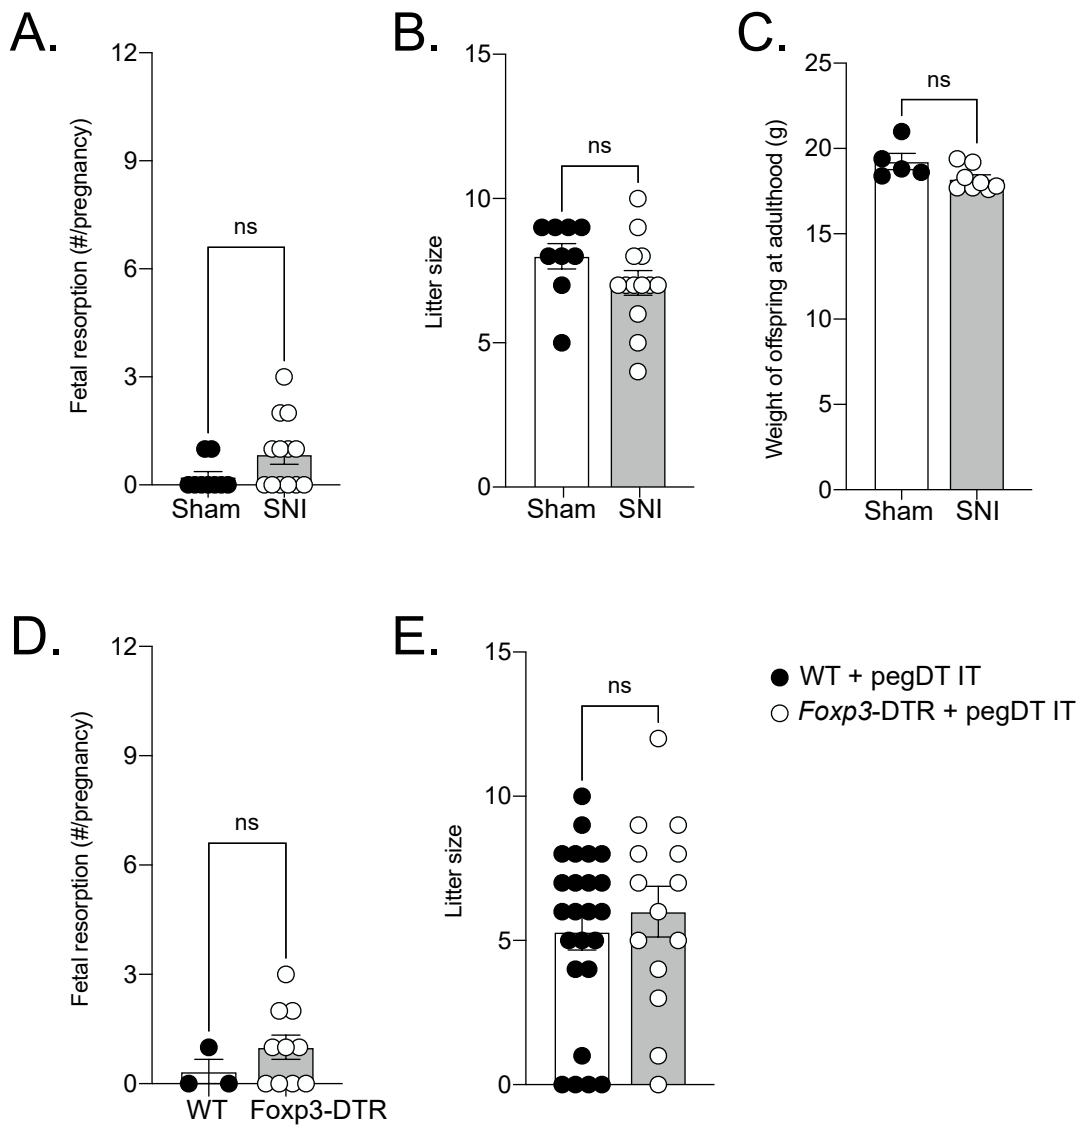

Supplement: media-1.pdf [file media-1.pdf]
