# Supplementary material
Source: PubMed Central journal article supplement (PMC11589916)

A.

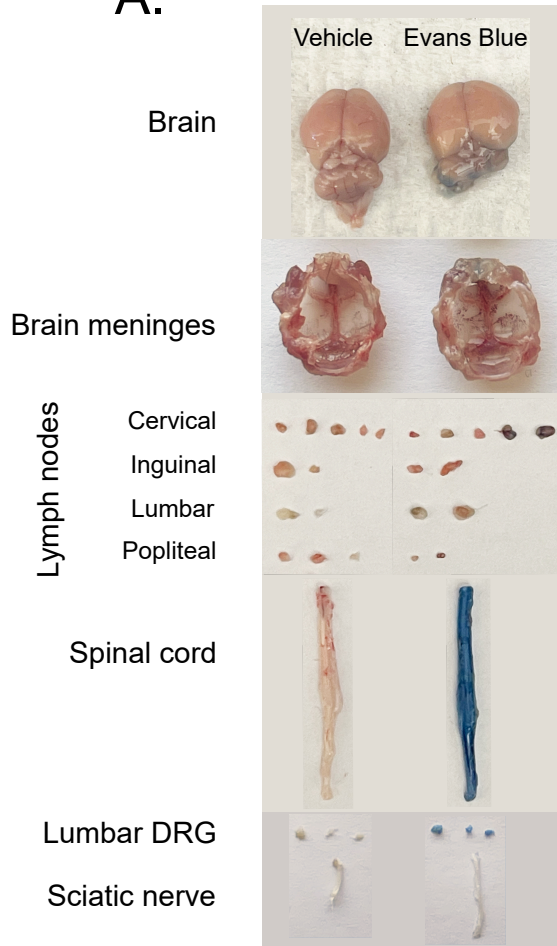

B.

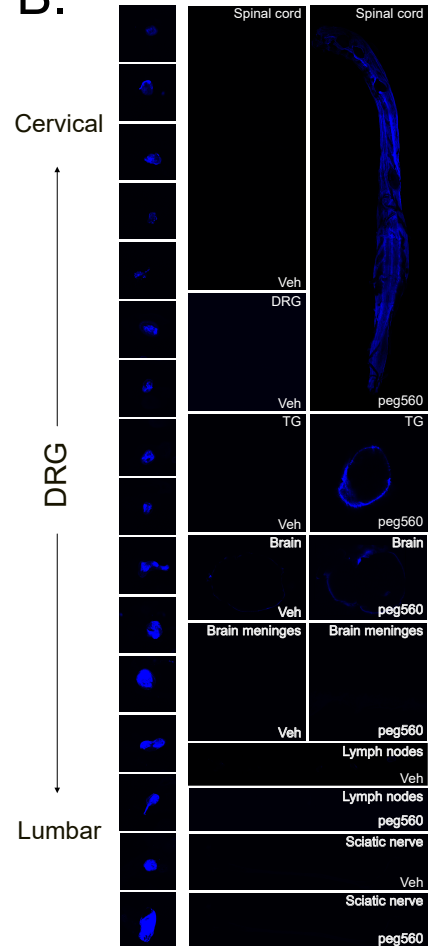

C.

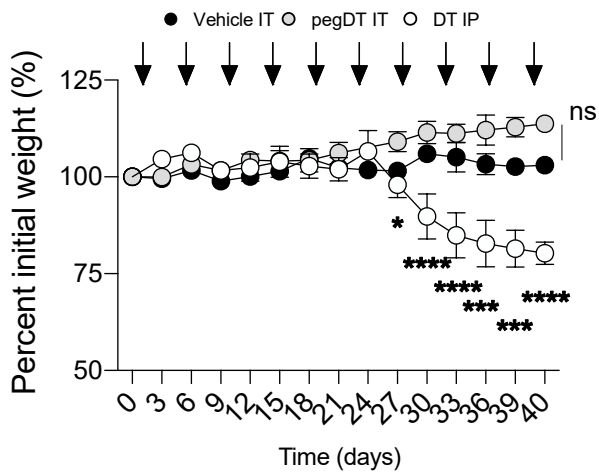

D.

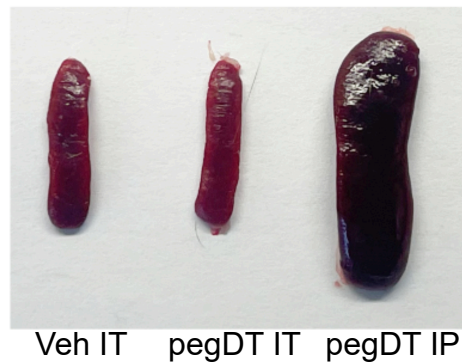

E.

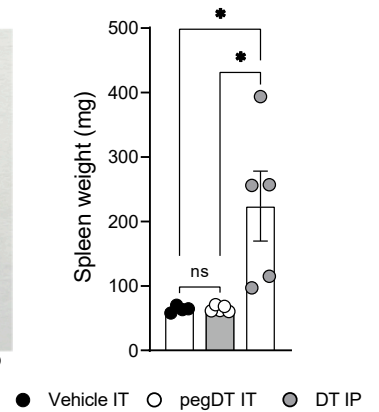

F.

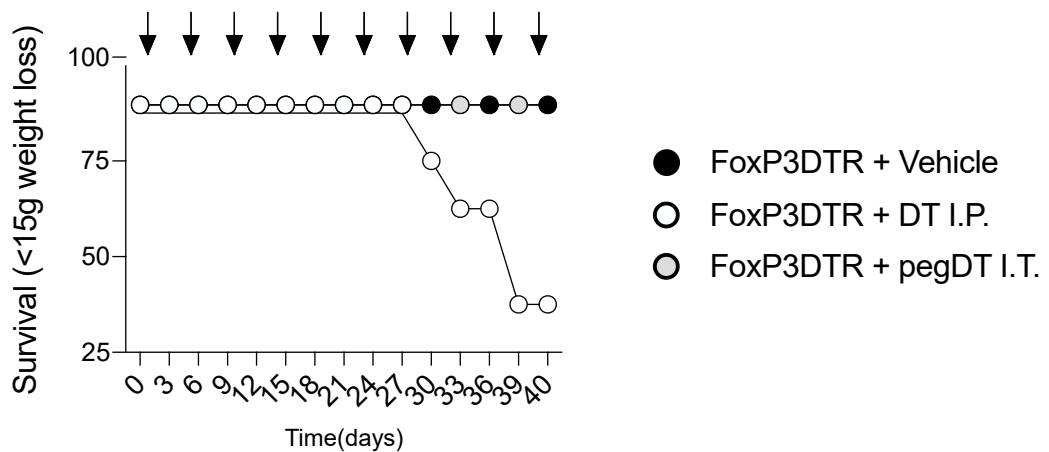

Supplement: media-2.pdf [file media-2.pdf]
